# Supplementary material for: The possible global hazard of cell phone radiation on thyroid cells and hormones: a systematic review of evidences
Source: Springer Nature journal article supplement (doi:10.1007/s11356-019-05096-z), 2019-05-06
Supplement: 11356_2019_5096_MOESM3_ESM.pdf [file 11356_2019_5096_MOESM3_ESM.pdf]

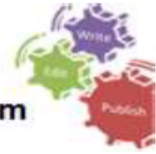

## EDITORIAL CERTIFICATE LETTER

---

This document is to certify that the manuscript listed below was edited for proper English language, grammar, punctuation, spelling, and overall style by one of the highly qualified subject-expert native English speaking editors at **NativeEnglishEdit.com**

The substantive content of the article mentioned below remains the full responsibility of the author/authors:

TITLE OF ARTICLE:

**The possible global hazard of cell phone radiation on thyroid cells and hormones: A systematic review of evidence**

AUTHOR(S):

JAFAR FATAHI ASL, BAGHER LARIJANI, MEHRNOOSH ZAKERKISH,  
FAKHER RAHIM, KIARASH SHIRBANDI, RASOUL AKBARI

REFER CODE:

EE-1396-3335377-FAKHER RAHIM

---

Documents receiving this certification should be English-ready for publication; however, the author has the ability to accept or reject our suggestions and changes.

This certificate may be verified at:

Native English Edit

[www.birminghamresearchpark.co.uk/tenants/native-english-edit](http://www.birminghamresearchpark.co.uk/tenants/native-english-edit)

[www.NativeEnglishEdit.com](http://www.NativeEnglishEdit.com)

Birmingham Research Park

Edgbaston

Birmingham B15 2SQ

United Kingdom
